# Supplementary material for: CAR-T Cells Based on Novel BCMA Monoclonal Antibody Block Multiple Myeloma Cell Growth
Source: Cancers (Basel). 2018 Sep 11;10(9):323. doi: 10.3390/cancers10090323 (PMC6162381; doi:10.3390/cancers10090323)
Supplement: Supplementary file 1 [file cancers-10-00323-s001.pdf]

# Supplementary Materials: CAR-T Cells Based on Novel BCMA Monoclonal Antibody Block Multiple Myeloma Cell Growth

Robert Berahovich <sup>1</sup>, Hua Zhou <sup>1</sup>, Shirley Xu <sup>1</sup>, Yuehua Wei <sup>1</sup>, Jasper Guan <sup>1</sup>, Jian Guan <sup>1</sup>, Hizkia Harto <sup>1</sup>, Shuxiang Fu <sup>2</sup>, Kaihuai Yang <sup>2</sup>, Shuying Zhu <sup>2</sup>, Le Li <sup>1,2</sup>, Lijun Wu <sup>1</sup> and Vita Golubovskaya <sup>1,\*</sup>

Supplementary Materials

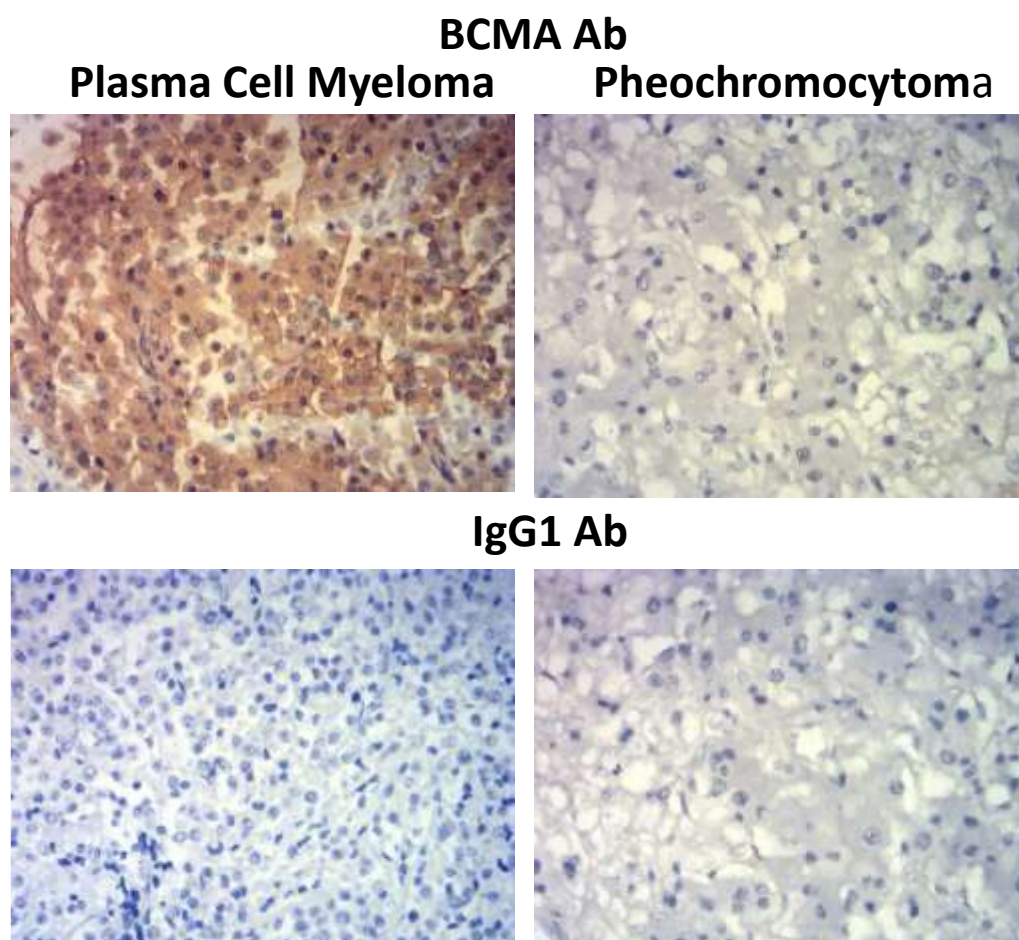

**Figure S1.** The IHC staining with BCMA Ab 4C8A and isotype control (1:300 dilution) was performed on primary bone marrow myeloma tissue sample and negative control adrenal gland pheochromocytoma tissue. 400 × magnification.

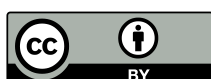

© 2018 by the authors. Submitted for possible open access publication under the terms and conditions of the Creative Commons Attribution (CC BY) license (<http://creativecommons.org/licenses/by/4.0/>).
